# Supplementary material for: Diversity in the Reproductive Modes of European Daphnia pulicaria Deviates from the Geographical Parthenogenesis
Source: PubMed Central journal article supplement (PMC3104988; doi:10.1371/journal.pone.0020049), 2011-05-31
Supplement: pone.0020049.s001.pdf [file pone.0020049.s001.pdf]

**Table S1.** Population information and statistics based on microsatellite data.

| <i>Population (code)</i>                       | <i>Lat</i> | <i>Long</i> | <i>Alt (m)</i> | <i>n</i> | <i>Ngen</i> | <i>G</i> | <i>R</i> | <i>Var</i> | <i>AR</i> | <i>H<sub>e</sub></i> | <i>H<sub>o</sub></i> | <i>F<sub>is</sub><sup>1</sup></i> | <i>F<sub>is</sub><sup>2</sup></i> | <i>HE (P)</i> | <i>HD (P)</i> | <i>r<sub>d</sub><sup>1</sup></i> | <i>r<sub>d</sub><sup>2</sup></i> | <i>GDR</i> |  |
|------------------------------------------------|------------|-------------|----------------|----------|-------------|----------|----------|------------|-----------|----------------------|----------------------|-----------------------------------|-----------------------------------|---------------|---------------|----------------------------------|----------------------------------|------------|--|
| <b>High Tatra Mts. (HTM)</b>                   |            |             |                |          |             |          |          |            |           |                      |                      |                                   |                                   |               |               |                                  |                                  |            |  |
| Zelené Krivánske (ZelKriv)                     | 49.159     | 20.008      | 2017           | 60       | 59          | 2        | 0.017    | 35.753     | 2.875     | 0.586                | 0.875                | -0.486***                         | -0.167                            | 0.000         | 1.000         | 0.003***                         | N/A                              | 0.734      |  |
| Czarny Staw pod Rysmi (CzarStaw)               | 49.189     | 20.078      | 1580           | 60       | 60          | 2        | 0.017    | 32.677     | 2.875     | 0.594                | 0.875                | -0.468***                         | -0.167                            | 0.000         | 1.000         | 0.007***                         | N/A                              | 0.736      |  |
| Vyšné Temnosmrečianske (VTSM)                  | 49.189     | 20.038      | 1716           | 62       | 62          | 2        | 0.016    | 15.776     | 2.875     | 0.593                | 0.875                | -0.469***                         | -0.167                            | 0.000         | 1.000         | 0.005***                         | N/A                              | 0.738      |  |
| Malé Hincovo (MHinc)                           | 49.174     | 20.057      | 1923           | 60       | 60          | 1        | 0.000    | 42.267     | 1.875     | 0.438                | 0.875                | -1.000***                         | N/A                               | 0.000         | 1.000         | N/A                              | N/A                              | 0.667      |  |
| Zelené Javorove (ZelJ)                         | 49.206     | 20.142      | 1811           | 30       | 30          | 1        | 0.000    | 90.808     | 1.875     | 0.438                | 0.875                | -1.000***                         | N/A                               | 0.000         | 1.000         | N/A                              | N/A                              | 0.667      |  |
| <b>Pyrenees (Pyr)</b>                          |            |             |                |          |             |          |          |            |           |                      |                      |                                   |                                   |               |               |                                  |                                  |            |  |
| Estats (Estats)                                | 42.659     | 1.391       | 2470           | 30       | 27          | 24       | 0.885    | 8.027      | 2.250     | 0.271                | 0.329                | -0.195*                           | -0.181*                           | 0.028         | 0.970         | 0.024                            | 0.005                            | 1.064      |  |
| Sotllo (Sotllo)                                | 42.652     | 1.385       | 2346           | 22       | 16          | 14       | 0.867    | 7.174      | 1.750     | 0.242                | 0.305                | -0.226*                           | -0.248*                           | 0.018         | 0.983         | 0.043                            | 0.022                            | 0.795      |  |
| Redon (Redon)                                  | 42.642     | 0.780       | 2240           | 32       | 29          | 8        | 0.250    | 34.234     | 2.500     | 0.284                | 0.259                | 0.106                             | 0.318                             | 1.000         | 0.000         | 0.069***                         | 0.007***                         | 2.202      |  |
| Estantet de Gerber 1 (EG1)                     | 42.621     | 0.992       | 2341           | 22       | 15          | 11       | 0.714    | 1.674      | 2.250     | 0.201                | 0.233                | -0.126                            | -0.042                            | 0.217         | 0.782         | 0.051***                         | 0.014***                         | 0.937      |  |
| Estantet de Gerber 2 (EG2)                     | 42.621     | 0.991       | 2341           | 22       | 14          | 14       | 1.000    | 3.269      | 2.375     | 0.283                | 0.295                | -0.004                            | -0.004                            | 0.380         | 0.625         | 0.011                            | 0.122                            | 0.862      |  |
| Estantet de Gerber 3 (EG3)                     | 42.622     | 0.991       | 2341           | 22       | 18          | 13       | 0.706    | 3.852      | 2.000     | 0.195                | 0.229                | -0.145                            | -0.103                            | 0.491         | 0.503         | 0.033                            | 0.012                            | 2.164      |  |
| Estanty Negre de Salenques (ENS)               | 42.604     | 0.693       | 2590           | 22       | 18          | 8        | 0.412    | 1.000      | 1.750     | 0.196                | 0.208                | -0.034                            | 0.133                             | 0.998         | 0.002         | 0.084**                          | 0.099**                          | 2.747      |  |
| Estanty del Port de Salenques (EPS)            | 42.607     | 0.683       | 2660           | 20       | 17          | 16       | 0.938    | 11.495     | 2.000     | 0.275                | 0.324                | -0.146                            | -0.147                            | 0.085         | 0.916         | -0.020                           | 0.036                            | 0.875      |  |
| Estanty Negre de Gerber (ENG)                  | 42.616     | 0.990       | 2440           | 20       | 17          | 4        | 0.188    | 0.927      | 1.375     | 0.067                | 0.088                | -0.293*                           | -0.200                            | 0.046         | 1.000         | 0.084**                          | N/A                              | 0.534      |  |
| <b>European lowland lakes and ponds (LLaP)</b> |            |             |                |          |             |          |          |            |           |                      |                      |                                   |                                   |               |               |                                  |                                  |            |  |
| King George's reservoir (KGeorge)              | 51.452     | -0.502      | 17             | 30       | 29          | 11       | 0.357    | 24.691     | 2.750     | 0.386                | 0.582                | -0.493***                         | -0.415***                         | 0.000         | 1.000         | 0.069***                         | -0.046                           | 0.936      |  |
| pond Nový (Novy)                               | 49.437     | 13.785      | 429            | 30       | 29          | 29       | 1.000    | 46.415     | 4.500     | 0.497                | 0.509                | -0.007                            | -0.007                            | 0.456         | 0.505         | 0.031                            | 0.015                            | 0.891      |  |
| Lake Chabařovice (Chabarovice)                 | 50.654     | 13.944      | 137            | 32       | 32          | 15       | 0.452    | 46.096     | 3.250     | 0.381                | 0.551                | -0.435***                         | -0.257***                         | 0.000         | 1.000         | 0.037***                         | 0.013***                         | 1.035      |  |
| Lake Ohrid (Ohrid)                             | 41.020     | 20.700      | 695            | 30       | 29          | 9        | 0.286    | 4.273      | 2.250     | 0.419                | 0.754                | -0.794***                         | -0.705***                         | 0.000         | 1.000         | 0.027**                          | 0.011                            | 0.665      |  |

Lat, latitude; Long, longitude; Alt, altitude; n, number of individuals; Ngen, number of individuals with complete genotype; G, number of distinct multilocus genotypes; R, genotypic richness; Var, variance in allele size; AR, allelic richness; H<sub>e</sub>, expected heterozygosity; H<sub>o</sub>, observed heterozygosity; Fis, inbreeding coefficient calculated using dataset with multicopies (F<sub>is</sub><sup>1</sup>) and without multicopies (F<sub>is</sub><sup>2</sup>); P, probabilities for the exact test of Hardy-Weinberg equilibrium assuming, respectively, heterozygote excess (HE) and deficiency (HD) as the alternative hypothesis to panmixia. Multilocus linkage disequilibrium (rd) tests were performed on dataset with multicopies (rd<sup>1</sup>) and without multicopies (rd<sup>2</sup>). GDR, genotypic diversity ratio. Statistical significance, \*P < 0.05; \*\*P < 0.01; \*\*\*P < 0.00.
